# Supplementary material
Source: PubMed Central journal article supplement (PMC6752204)
Supplement: NIHMS1039418-supplement-Supplem.pdf [file NIHMS1039418-supplement-Supplem.pdf]

**Supplementary table S1: additional treatment with avastin stratified by (a) TCGA subtype and (b) EGFR amplification status**

**a**

|                                                      | Classical | Mesenchymal | Proneural | p Value |
|------------------------------------------------------|-----------|-------------|-----------|---------|
|                                                      | n (%)     | n (%)       | n (%)     |         |
| <b><u>Number of treatment pre bevacizumab</u></b>    |           |             |           |         |
| 0                                                    | 1 (5%)    | 1 (5%)      | 0 (0%)    | 0.453   |
| 1                                                    | 5 (26%)   | 5 (24%)     | 5 (22%)   |         |
| 2                                                    | 7 (37%)   | 9 (43%)     | 10 (43%)  |         |
| 3                                                    | 4 (21%)   | 6 (29%)     | 3 (13%)   |         |
| 4                                                    | 2 (11%)   | 0 (0%)      | 5 (22%)   |         |
| <b><u>Number of treatment during bevacizumab</u></b> |           |             |           |         |
| 0                                                    | 11 (58%)  | 9 (43%)     | 9 (39%)   | 0.588   |
| 1                                                    | 5 (26%)   | 10 (48%)    | 10 (43%)  |         |
| 2                                                    | 2 (11%)   | 2 (10%)     | 4 (17%)   |         |
| 3                                                    | 1 (5%)    | 0 (0%)      | 0 (0%)    |         |
| <b><u>Number of treatment post bevacizumab</u></b>   |           |             |           |         |
| 0                                                    | 10 (53%)  | 13 (62%)    | 17 (74%)  | 0.133   |
| 1                                                    | 5 (26%)   | 7 (33%)     | 3 (13%)   |         |
| 2                                                    | 4 (21%)   | 0 (0%)      | 1 (4%)    |         |
| 3                                                    | 0 (0%)    | 1 (5%)      | 1 (4%)    |         |
| 4                                                    | 0 (0%)    | 0 (0%)      | 1 (4%)    |         |

**b**

| <b>EGFR amplification status</b>                     |           |            |                |                |
|------------------------------------------------------|-----------|------------|----------------|----------------|
|                                                      | <b>No</b> | <b>Yes</b> | <b>Unknown</b> | <b>p value</b> |
| <b><u>Number of treatment pre bevacizumab</u></b>    |           |            |                |                |
| 0                                                    | 0 (0%)    | 2 (9%)     | 0 (0%)         | 0,298          |
| 1                                                    | 8 (30%)   | 6 (26%)    | 1 (8%)         |                |
| 2                                                    | 10 (37%)  | 7 (30%)    | 9 (69%)        |                |
| 3                                                    | 5 (19%)   | 5 (22%)    | 3 (23%)        |                |
| 4                                                    | 4 (15%)   | 3 (13%)    | 0 (0%)         |                |
| <b><u>Number of treatment during bevacizumab</u></b> |           |            |                |                |
| 0                                                    | 11 (41%)  | 11 (48%)   | 7 (54%)        | 0,785          |
| 1                                                    | 13 (48%)  | 7 (30%)    | 5 (38%)        |                |
| 2                                                    | 3 (11%)   | 4 (17%)    | 1 (8%)         |                |
| 3                                                    | 0 (0%)    | 1 (4%)     | 0 (0%)         |                |
| <b><u>Number of treatment post bevacizumab</u></b>   |           |            |                |                |
| 0                                                    | 20 (74%)  | 15 (65%)   | 5 (38%)        | 0,109          |
| 1                                                    | 5 (19%)   | 5 (22%)    | 5 (38%)        |                |
| 2                                                    | 1 (4%)    | 3 (13%)    | 1 (8%)         |                |
| 3                                                    | 0 (0%)    | 0 (0%)     | 2 (15%)        |                |
| 4                                                    | 1 (4%)    | 0 (0%)     | 0 (0%)         |                |
